# Supplementary material for: Aerosol optical properties and direct radiative forcing based on measurements from the China Aerosol Remote Sensing Network (CARSNET) in eastern China
Source: Copernicus journal article supplement (doi:10.5194/acp-18-405-2018), 2018-01-15
Supplement: Supplementary file 1 [file acp-18-405-2018-supplement.pdf]

Supplement of Atmos. Chem. Phys., 18, 405–425, 2018  
<https://doi.org/10.5194/acp-18-405-2018-supplement>  
© Author(s) 2018. This work is distributed under  
the Creative Commons Attribution 4.0 License.

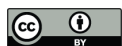

*Supplement of*

## **Aerosol optical properties and direct radiative forcing based on measurements from the China Aerosol Remote Sensing Network (CARSNET) in eastern China**

**Huizheng Che et al.**

*Correspondence to:* Huizheng Che (chehz@cma.gov.cn) and Xiaoye Zhang (xiaoye@cma.gov.cn)

The copyright of individual parts of the supplement might differ from the CC BY 4.0 License.

Supplement

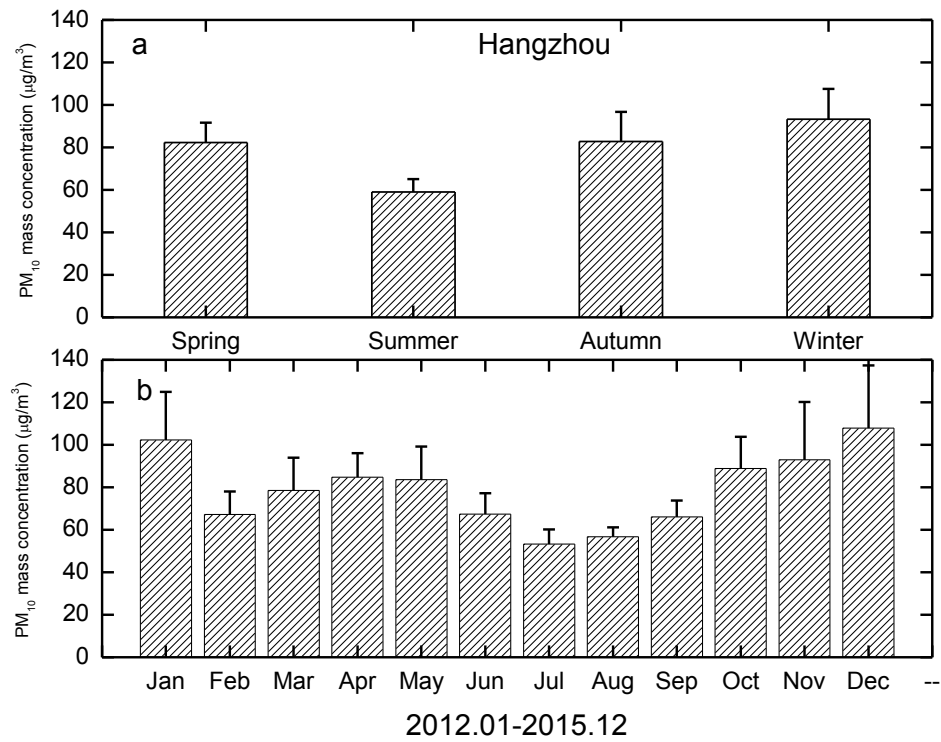

Seasonal and monthly variations of PM<sub>10</sub> mass concentrations (µg/m<sup>3</sup>) in Hangzhou during 2012-2015 (data are from China National Environmental Monitoring Centre <http://www.cnemc.cn/>)
